# Supplementary material for: Negative Associations between Quality of Urban Green Spaces and Health Expenditures in Downtown Shanghai
Source: MDPI journal article supplement (doi:10.3390/land11081261), 2022-08-06
Supplement: s1 [file s1]

Archive with 1 entries (1 files):
- land-1841454-supplementary.pdf
