# Supplementary material for: Negative Associations between Quality of Urban Green Spaces and Health Expenditures in Downtown Shanghai
Source: MDPI journal article supplement (doi:10.3390/land11081261), 2022-08-06
Supplement: s1 [file s1 › land-1841454-supplementary.pdf]

## Supplementary Materials

We examined the correlation of variables using bivariate correlation analysis (Table S1). The perceived quantity of UGS was found to be significantly and positively correlated with total UGS and greenery coverage. Total UGS was also significantly and positively associated with greenery coverage. To explore the interaction among different UGS types, we examined the correlation between cropland, forest, grassland, and the sum of them. The results (Table S2) showed that the quantity of grasslands was found to be significantly and positively correlated with the number of forests only, and the correlation was rather weak (Spearman's coefficient = 0.161,  $p < 0.05$ ). The farmland and forests were significantly and positively correlated with the total amount of UGS.

**Table S1.** Correlation check of perceived UGS quantity variables.

|                     | Perceived Quantity | Total number  | Greenery coverage |
|---------------------|--------------------|---------------|-------------------|
| Perceived Quantity  | 1.000              |               |                   |
| Total number of UGS | <b>.612**</b>      | 1.000         |                   |
| Greenery coverage   | <b>.489**</b>      | <b>.424**</b> | 1.000             |

\*. At the 0.05 level (two-tailed), the correlation is significant; \*\*. At the 0.01 level (two-tailed), the correlation is significant.

**Table S2.** Correlation check of the UGS quantity in the 400m -buffer zone.

|                            | cropland-<br>buf400perc | forest-<br>buf400perc | grass-<br>buf400perc | sum(cropland-<br>forest-<br>grass) |
|----------------------------|-------------------------|-----------------------|----------------------|------------------------------------|
| cropland-buf400perc        | 1.000                   |                       |                      |                                    |
| forest-buf400perc          | <b>.459**</b>           | 1.000                 |                      |                                    |
| grass-buf400perc           | 0.007                   | <b>.161**</b>         | 1.000                |                                    |
| sum(cropland-forest-grass) | <b>.983**</b>           | <b>.567**</b>         | 0.058                | 1.000                              |

\*. At the 0.05 level (two-tailed), the correlation is significant; \*\*. At the 0.01 level (two-tailed), the correlation is significant.

**Table S3.** Indicators of UGS quantity of nearby UGS.

| Variables          | Sample size (Proportion) |
|--------------------|--------------------------|
| Perceived quantity | Very inadequate          |
|                    | Inadequate               |
|                    | General                  |
|                    | Adequate                 |
|                    | Very adequate            |
| Total amount       | 1-2                      |
|                    | 3-4                      |
|                    | 5-6                      |
|                    | 7-8                      |
|                    | More than 8              |
| Greenery coverage  | 0-10%                    |
|                    | 10-20%                   |
|                    | 20-30%                   |
|                    | 30-40%                   |
|                    | 50-60%                   |

**Table S4.** Perceived quality of different types of UGS.

| Variables                       |           | Sample size<br>(Proportion) | Variables     |           | Sample size<br>(Proportion) |
|---------------------------------|-----------|-----------------------------|---------------|-----------|-----------------------------|
| The most frequently visited UGS | Very bad  | 0 (0)                       | Community UGS | Very bad  | 4 (0.4)                     |
|                                 | Bad       | 2 (0.2)                     |               | Bad       | 153 (15.3)                  |
|                                 | General   | 167 (16.7)                  |               | General   | 468 (46.8)                  |
|                                 | Good      | 611 (61.1)                  |               | Good      | 319 (31.9)                  |
|                                 | Very good | 201 (20.1)                  |               | Very good | 0 (0)                       |
| Favorite UGS                    | Very bad  | 0 (0)                       | Workplace UGS | Very bad  | 56 (5.6)                    |
|                                 | Bad       | 0 (0)                       |               | Bad       | 1 (0.1)                     |
|                                 | General   | 7 (0.7)                     |               | General   | 59 (5.9)                    |
|                                 | Good      | 122 (12.2)                  |               | Good      | 130 (13.0)                  |
|                                 | Very good | 50 (5.0)                    |               | Very good | 27 (2.7)                    |
| Nearby UGS                      | Very bad  | 1 (0.1)                     |               |           |                             |
|                                 | Bad       | 1 (0.1)                     |               |           |                             |
|                                 | General   | 310 (31.0)                  |               |           |                             |
|                                 | Good      | 624 (62.4)                  |               |           |                             |
|                                 | Very good | 64 (6.4)                    |               |           |                             |

**Table S5.** Results of descriptive statistics for 20 activities.

| Activities                                 |                  | Sitting | Chatting           | Dating                           | Picnic<br>Gathering | Walking   | Cycling        | Running | Ball<br>games    | Dancing                    | Fitness<br>facilities |
|--------------------------------------------|------------------|---------|--------------------|----------------------------------|---------------------|-----------|----------------|---------|------------------|----------------------------|-----------------------|
| Demand                                     | Average<br>value | 3.80    | 3.73               | 3.58                             | 2.84                | 4.06      | 3.00           | 2.85    | 3.15             | 3.18                       | 3.44                  |
| Supply                                     | Average<br>value | 3.39    | 3.37               | 3.20                             | 2.42                | 4.01      | 2.68           | 2.58    | 2.90             | 3.03                       | 3.30                  |
| Quality<br>(supply–<br>demand<br>variance) | Average<br>value | -0.42   | -0.36              | -0.38                            | -0.42               | -0.05     | -0.32          | -0.27   | -0.24            | -0.15                      | -0.14                 |
| Activities                                 |                  | Viewing | Water-<br>friendly | Playing<br>chess<br>and<br>cards | Singing             | Gardening | Dog<br>walking | Playing | Parent-<br>child | Festivals<br>and<br>events | Popular<br>Science    |
| Demand                                     | Average<br>value | 3.56    | 3.52               | 3.38                             | 3.29                | 3.06      | 2.12           | 2.74    | 3.08             | 3.21                       | 3.19                  |
| Supply                                     | Average<br>value | 3.29    | 3.14               | 3.30                             | 3.15                | 2.48      | 1.68           | 2.53    | 2.92             | 2.79                       | 2.76                  |
| Quality<br>(supply–<br>demand<br>variance) | Average<br>value | -0.26   | -0.37              | -0.08                            | -0.14               | -0.58     | -0.44          | -0.21   | -0.16            | -0.41                      | -0.43                 |

**Table S6** Correlation check between the perceived quality of different types of UGS and the quality based on user needs.

|                                                               | Perceived<br>quality of<br>most fre-<br>quently<br>visited<br>UGS | Perceived<br>quality of<br>favorite<br>UGS | Perceived<br>quality of<br>nearby<br>UGS | Perceived<br>quality of<br>community<br>UGS | Perceived<br>quality of<br>workplace<br>UGS | Sitting | Chatting | Dating | Picnic and<br>gathering | Walk-<br>ing | Cycling | Run-<br>ning | Ball<br>games | Dancing | Fitness fa-<br>cilities | View-<br>ing | Water-<br>friendly | Playing<br>chess<br>and<br>cards | Singing | Dog<br>walking | Playing | Parent-<br>child | Festival<br>and<br>events | Popular<br>Science |
|---------------------------------------------------------------|-------------------------------------------------------------------|--------------------------------------------|------------------------------------------|---------------------------------------------|---------------------------------------------|---------|----------|--------|-------------------------|--------------|---------|--------------|---------------|---------|-------------------------|--------------|--------------------|----------------------------------|---------|----------------|---------|------------------|---------------------------|--------------------|
| Perceived qual-<br>ity of most fre-<br>quently visited<br>UGS | 1.000                                                             |                                            |                                          |                                             |                                             |         |          |        |                         |              |         |              |               |         |                         |              |                    |                                  |         |                |         |                  |                           |                    |
| Perceived qual-<br>ity of favorite<br>UGS                     | 0.040                                                             | 1.000                                      |                                          |                                             |                                             |         |          |        |                         |              |         |              |               |         |                         |              |                    |                                  |         |                |         |                  |                           |                    |
| Perceived qual-<br>ity of nearby<br>UGS                       | .301**                                                            | 0.130                                      | 1.000                                    |                                             |                                             |         |          |        |                         |              |         |              |               |         |                         |              |                    |                                  |         |                |         |                  |                           |                    |
| Perceived qual-<br>ity of commu-<br>nity UGS                  | .104**                                                            | 0.109                                      | .244**                                   | 1.000                                       |                                             |         |          |        |                         |              |         |              |               |         |                         |              |                    |                                  |         |                |         |                  |                           |                    |
| Perceived qual-<br>ity of workplace<br>UGS                    | .171*                                                             | 0.269                                      | 0.107                                    | 0.105                                       | 1.000                                       |         |          |        |                         |              |         |              |               |         |                         |              |                    |                                  |         |                |         |                  |                           |                    |
| Sitting                                                       | 0.007                                                             | -0.012                                     | .089**                                   | 0.036                                       | -0.036                                      | 1.000   |          |        |                         |              |         |              |               |         |                         |              |                    |                                  |         |                |         |                  |                           |                    |
| Chatting                                                      | 0.018                                                             | -0.087                                     | 0.058                                    | 0.006                                       | -0.058                                      | .753**  | 1.000    |        |                         |              |         |              |               |         |                         |              |                    |                                  |         |                |         |                  |                           |                    |
| Dating                                                        | 0.032                                                             | -0.026                                     | .069*                                    | 0.005                                       | -0.090                                      | .567**  | .698**   | 1.000  |                         |              |         |              |               |         |                         |              |                    |                                  |         |                |         |                  |                           |                    |
| Picnic and gath-<br>ering                                     | -0.044                                                            | -0.009                                     | 0.029                                    | -0.004                                      | -0.092                                      | .279**  | .363**   | .401** | 1.000                   |              |         |              |               |         |                         |              |                    |                                  |         |                |         |                  |                           |                    |
| Walking                                                       | .089**                                                            | 0.042                                      | .065*                                    | .068*                                       | -0.046                                      | .204**  | .202**   | .205** | 0.051                   | 1.000        |         |              |               |         |                         |              |                    |                                  |         |                |         |                  |                           |                    |
| Cycling                                                       | 0.007                                                             | 0.009                                      | -0.007                                   | -0.034                                      | -0.112                                      | 0.035   | .087**   | .103** | .248**                  | 0.062        | 1.000   |              |               |         |                         |              |                    |                                  |         |                |         |                  |                           |                    |
| Running                                                       | -0.014                                                            | 0.105                                      | 0.022                                    | -0.016                                      | -0.126                                      | 0.039   | 0.051    | .074*  | .216**                  | .070*        | .535**  | 1.000        |               |         |                         |              |                    |                                  |         |                |         |                  |                           |                    |
| Ball games                                                    | 0.005                                                             | -0.018                                     | -0.017                                   | 0.005                                       | -0.110                                      | 0.030   | .101**   | .133** | .215**                  | .109**       | .458**  | .631**       | 1.000         |         |                         |              |                    |                                  |         |                |         |                  |                           |                    |
| Dancing                                                       | 0.020                                                             | 0.000                                      | 0.030                                    | 0.016                                       | -0.091                                      | .117**  | .126**   | .153** | .114**                  | .150**       | .239**  | .251**       | .323**        | 1.000   |                         |              |                    |                                  |         |                |         |                  |                           |                    |
| Fitness facilities                                            | -0.001                                                            | -0.018                                     | -0.014                                   | -0.016                                      | -.164*                                      | .110**  | .136**   | .147** | .092**                  | .170**       | .213**  | .210**       | .284**        | .434**  | 1.000                   |              |                    |                                  |         |                |         |                  |                           |                    |
| Viewing                                                       | 0.033                                                             | -0.057                                     | 0.035                                    | 0.020                                       | -.141*                                      | .121**  | .165**   | .158** | .083**                  | .096**       | .136**  | .142**       | .187**        | .318**  | .482**                  | 1.000        |                    |                                  |         |                |         |                  |                           |                    |

\*. At the 0.05 level (two-tailed), the correlation is significant; \*\*. At the 0.01 level (two-tailed), the correlation is significant
